# Supplementary material for: Effect of Upper Limb Motor Rehabilitation on Cognition in Parkinson’s Disease: An Observational Study
Source: Brain Sci. 2022 Dec 8;12(12):1684. doi: 10.3390/brainsci12121684 (PMC9775162; doi:10.3390/brainsci12121684)
Supplement: Supplementary file 1 [file brainsci-12-01684-s001.zip › Tables S1 & S2.xlsx]

## Sheet: Non parametrici
		Outcome	Pre Treatment	Post Treatment	Follow-up	Within group comparison
						post vs. pre-treatment p value	Follow-up vs pre-treatment p value
		TMT A (seconds) mean (SD)	78.47 (40.48)	65,63 (36.12)	86.88 (49.07)	0.011*	0.309				DSF (3-8) median (IQR)	5,5 (5; 6)	5 (5; 6)	5 (4; 5,75)	0,739 (-0,333)	0,021 (-2,309)*
		ALL_SA (mseconds) mean (SD)	429.60 (197.76)	367.44 (135.33)	381.44 (124.94)	0.033*	0.049*
		ALL_CA (mseconds) mean (SD)	402.55 (164.07)	347.2 (116.42)	350.56 (89.09)	0.009*	0.079
		MDS-UPDRS partIII (0-136) median (IQR)	20 (16.75; 38.25)	18 (13; 33)	18.50 (14.5; 30.75)	0.005*	0.028*
		DASH (0-150) median (IQR)	47 (36; 51.25)	39 (32; 43.75)	36 (32; 46)	0*	0.001*
		Abbreviations: IQR= interquantile range; SD= standard deviation;TMT A= Trial Making Test part A; ALL_SA= Alertness without advertisement; ALL_CA= Alertness with advertisement; MDS- UPDRS part III= Unified Parkinson’s Disease Rating Scale part III; DASH= Disability of the Arm, Shoulder and Hand Questionnaire. *= statistically significant (p<0.05).

## Sheet: Parametrici
		Outcome	Pre Treatment	Post Treatment	Follow-up	Repeated measures ANOVA p value	Pos hoc analysis Whitin group comparison
							post- vs pre-treatment p value (95% CI)	follow-up vs pre-treatment p value (95% CI)
		MoCA (0-30) mean (SD)	22.35 (4.92)	23 (4.69)	23.06 (3.26)	0.468	/	/
		TMT B (seconds) mean (SD)	179.63 (81.19)	153.95 (74.96)	208.76 (93.57)	0.045*	0,011 (7.53; 49.88)*	0,389 (-56.94; 23.41)
		DSym (0-93) mean (SD)	21.94 (9.16)	24.47 (8.17)	23.71 (9.47)	0.004*	0.003 (-3.97; -0.97)*	0,007 (-4.65; -0.87)*
		DSB (2-8) mean (SD)	3.80 (1.23)	3.65 (1.08)	3.78 (1.11)	0.611	/	/
		Abbreviations SD= standard deviation; CI= confidence interval; MoCA= Montreal Cognitive Assessment; TMT B= Trial Making Test part B; DSym= Digit Symbol; DSB= Digit Span Backword. *= statistically significant (p<0.05).
