# Supplementary figures and images for: Effect of Upper Limb Motor Rehabilitation on Cognition in Parkinson’s Disease: An Observational Study
Source: MDPI journal article supplement (doi:10.3390/brainsci12121684), 2022-12-08

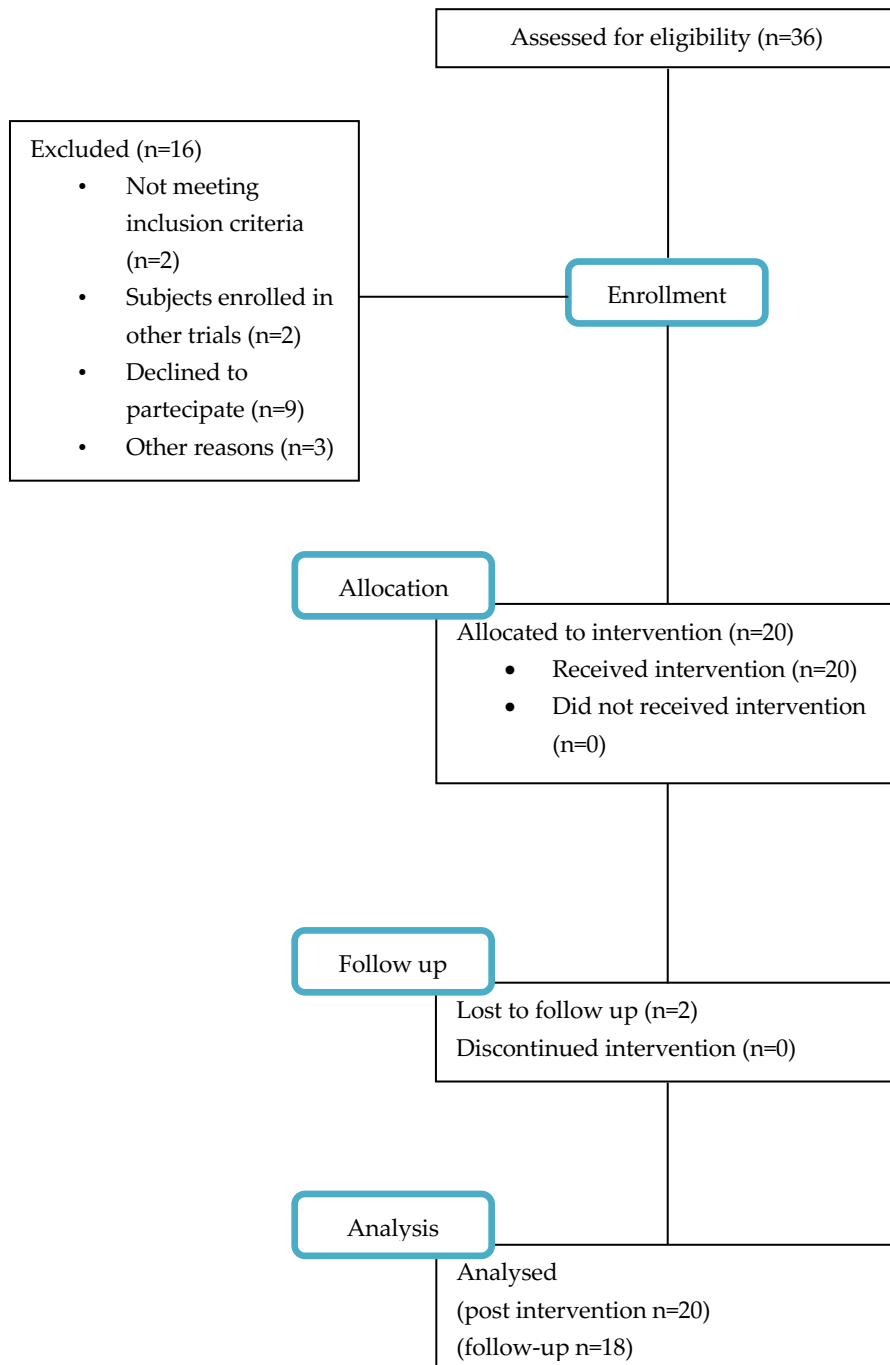

Supplement: s1 [file s1]
